# Supplementary material
Source: Springer Nature journal article supplement (https://www.springermedizin.de/resource/supplementary/12947_2007_190_MOESM2_ESM.pdf/9556546)

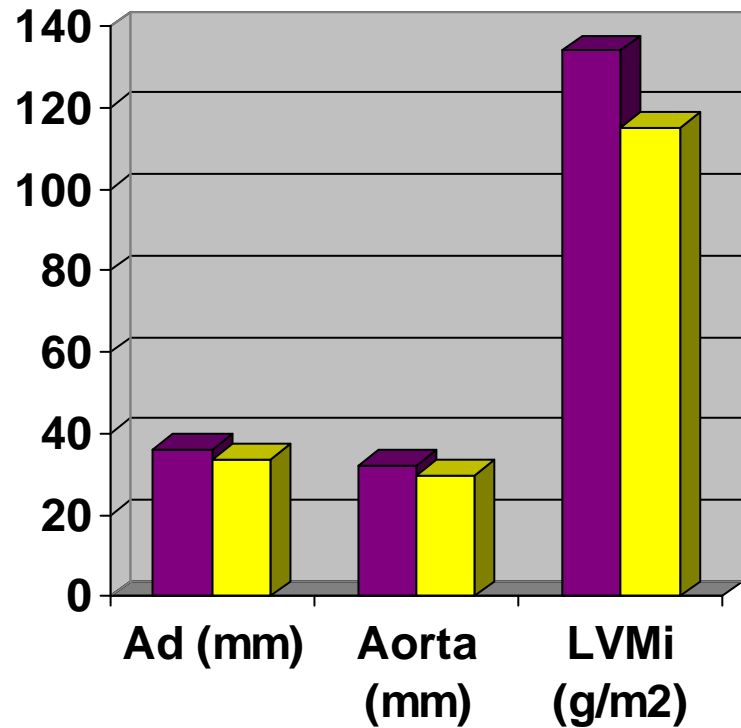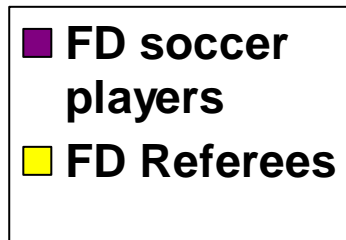

Supplement: MOESM2 [file 9556546]
